# Supplementary material
Source: MDPI journal article supplement (https://www.mdpi.com/2673-3943/1/2/8)
Supplement: s1 [file s1]

# Supplementary Materials: Dental Implant Failure Rate and Marginal Bone Loss in Transplanted Patients: A Systematic Review and Meta-Analysis

Marcela Paraizo †, João Botelho †, Vanessa Machado, José João Mendes, Ricardo Alves, Paulo Mascarenhas \* and José Maria Cardoso

† Marcela Paraizo and João Botelho are equally first authors.

Table S1. PRISMA 2009 Checklist.

| Section/topic.                | #  | Checklist item                                                                                                                                                                                           | Reported on page # |
|-------------------------------|----|----------------------------------------------------------------------------------------------------------------------------------------------------------------------------------------------------------|--------------------|
| Risk of bias across studies   | 15 | Specify any assessment of risk of bias that may affect the cumulative evidence (e.g., publication bias, selective reporting within studies).                                                             | NA                 |
| Additional analyses           | 16 | Describe methods of additional analyses (e.g., sensitivity or subgroup analyses, meta-regression), if done, indicating which were pre-specified.                                                         | 3                  |
| <b>RESULTS</b>                |    |                                                                                                                                                                                                          |                    |
| Study selection               | 17 | Give numbers of studies screened, assessed for eligibility, and included in the review, with reasons for exclusions at each stage, ideally with a flow diagram.                                          | 3–4                |
| Study characteristics         | 18 | For each study, present characteristics for which data were extracted (e.g., study size, PICOS, follow-up period) and provide the citations.                                                             | 3–4                |
| Risk of bias within studies   | 19 | Present data on risk of bias of each study and, if available, any outcome level assessment (see item 12).                                                                                                | 4                  |
| Results of individual studies | 20 | For all outcomes considered (benefits or harms), present, for each study: (a) simple summary data for each intervention group (b) effect estimates and confidence intervals, ideally with a forest plot. | 4                  |
| Synthesis of results          | 21 | Present results of each meta-analysis done, including confidence intervals and measures of consistency.                                                                                                  | 4–6                |
| Risk of bias across studies   | 22 | Present results of any assessment of risk of bias across studies (see Item 15).                                                                                                                          | NA                 |
| Additional analysis           | 23 | Give results of additional analyses, if done (e.g., sensitivity or subgroup analyses, meta-regression [see Item 16]).                                                                                    | NA                 |
| <b>DISCUSSION</b>             |    |                                                                                                                                                                                                          |                    |
| Summary of evidence           | 24 | Summarize the main findings including the strength of evidence for each                                                                                                                                  | 6                  |

|                |    |                                                                                                                                                               |     |
|----------------|----|---------------------------------------------------------------------------------------------------------------------------------------------------------------|-----|
|                |    | main outcome; consider their relevance to key groups (e.g., healthcare providers, users, and policy makers).                                                  |     |
| Limitations    | 25 | Discuss limitations at study and outcome level (e.g., risk of bias), and at review-level (e.g., incomplete retrieval of identified research, reporting bias). | 6–7 |
| Conclusions    | 26 | Provide a general interpretation of the results in the context of other evidence, and implications for future research.                                       | 7   |
| <b>FUNDING</b> |    |                                                                                                                                                               |     |
| Funding        | 27 | Describe sources of funding for the systematic review and other support (e.g., supply of data); role of funders for the systematic review.                    | 7   |

NA – Not applicable. From: Moher D, Liberati A, Tetzlaff J, Altman DG. The PRISMA Group (2009). Preferred Reporting Items for Systematic Reviews and Meta-Analyses: The PRISMA Statement. PLoS Med 6(7): e1000097. doi:10.1371/journal.pmed1000097. For more information, visit: [www.prisma-statement.org](http://www.prisma-statement.org).

**Table S2.** List of potentially relevant studies not included in the systematic review, along with the reasons for exclusion.

| Number | Reference                                                                                                                                                                                                                                                                   | Reason for exclusion |
|--------|-----------------------------------------------------------------------------------------------------------------------------------------------------------------------------------------------------------------------------------------------------------------------------|----------------------|
| 1      | Torre, D.D., & Burtscher, D. (2016). Ridge augmentation in an organ transplant patient. <i>International journal of oral and maxillofacial surgery</i> , 45(5).658-661. <a href="https://doi.org/10.1016/j.ijom.2015.11.002">https://doi.org/10.1016/j.ijom.2015.11.002</a> | Case report          |
| 2      | Nakagawa, A., Shitara, N., Ayukawa, Y., Koyano, K., & Nishimura, K. (2014). Implant treatment followed by living donor lung transplant: A follow-up case report. <i>Journal of Prosthodontic Research</i> , 58(2), 127-131.                                                 | Case report          |
| 3      | Gu, L., & Yu, Y.-C. (2011). Clinical outcome of dental implants placed in liver transplant recipients after 3 years: a case series. <i>Transplantation Proceedings</i> , 43(7), 2678-2682.                                                                                  | No control           |
| 4      | Heckmann, S. M., Heckmann, J. G., Linke, J. J., Hohenberger, W., & Mombelli, A. (2004). Implant therapy following liver transplantation: clinical and microbiological results after 10 years. <i>Journal of Periodontology</i> , 75(6), 909-913.                            | No control           |
